# Supplementary material for: Molecular target based combinational therapeutic approaches in thyroid cancer
Source: PubMed Central journal article supplement (PMC3418191; doi:10.1186/1479-5876-10-81), 2012-05-01

**A**

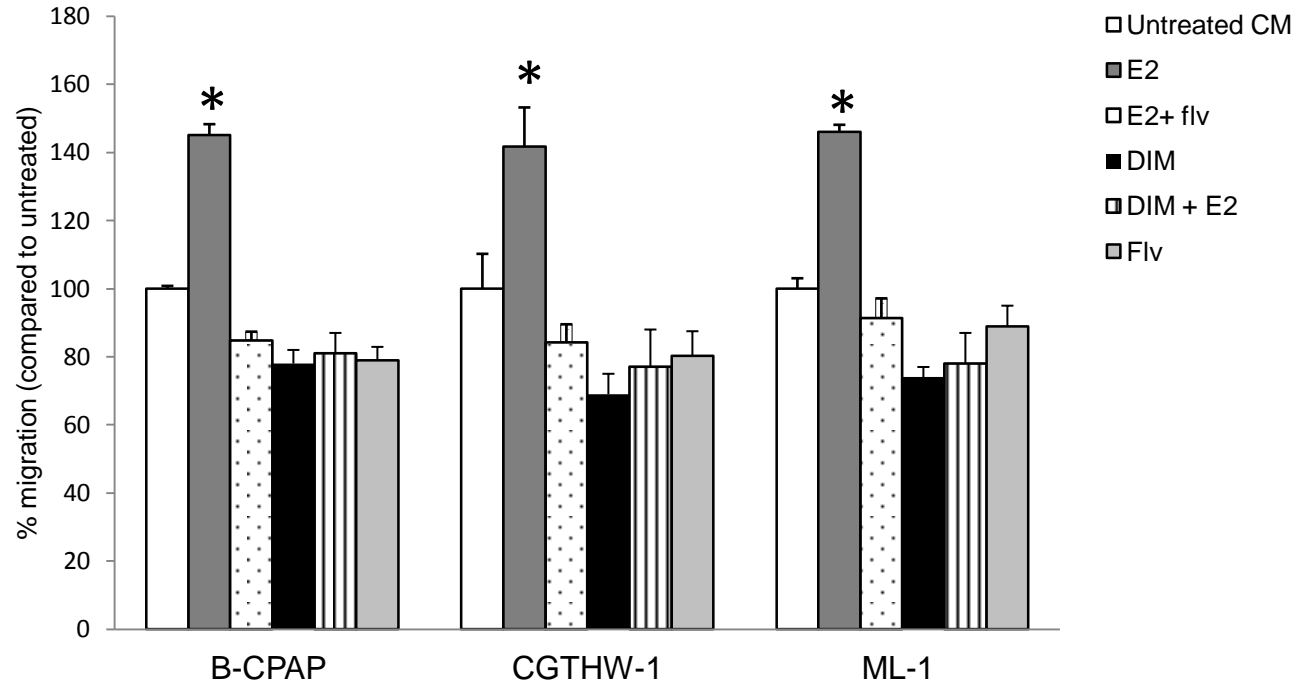

**B**

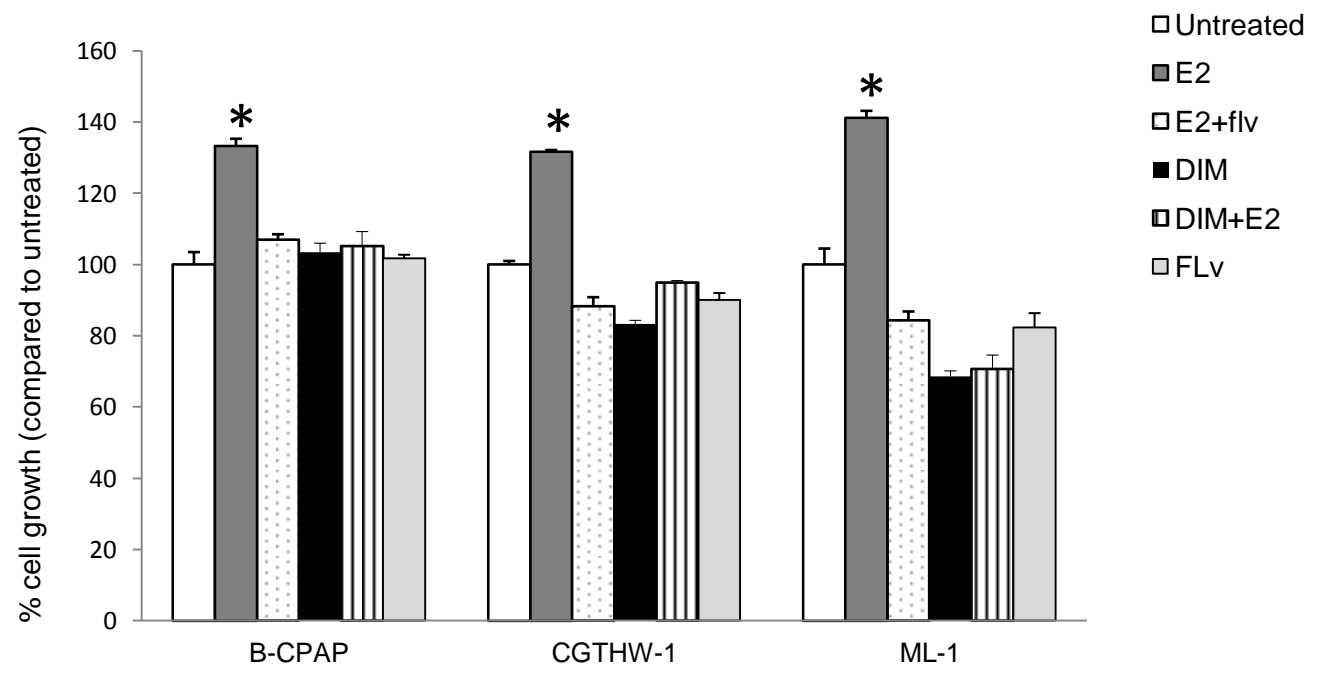

Supplement: 1479-5876-10-81-S1.pdf [file 1479-5876-10-81-S1.pdf]
