# Supplementary material for: Molecular target based combinational therapeutic approaches in thyroid cancer
Source: PubMed Central journal article supplement (PMC3418191; doi:10.1186/1479-5876-10-81), 2012-05-01

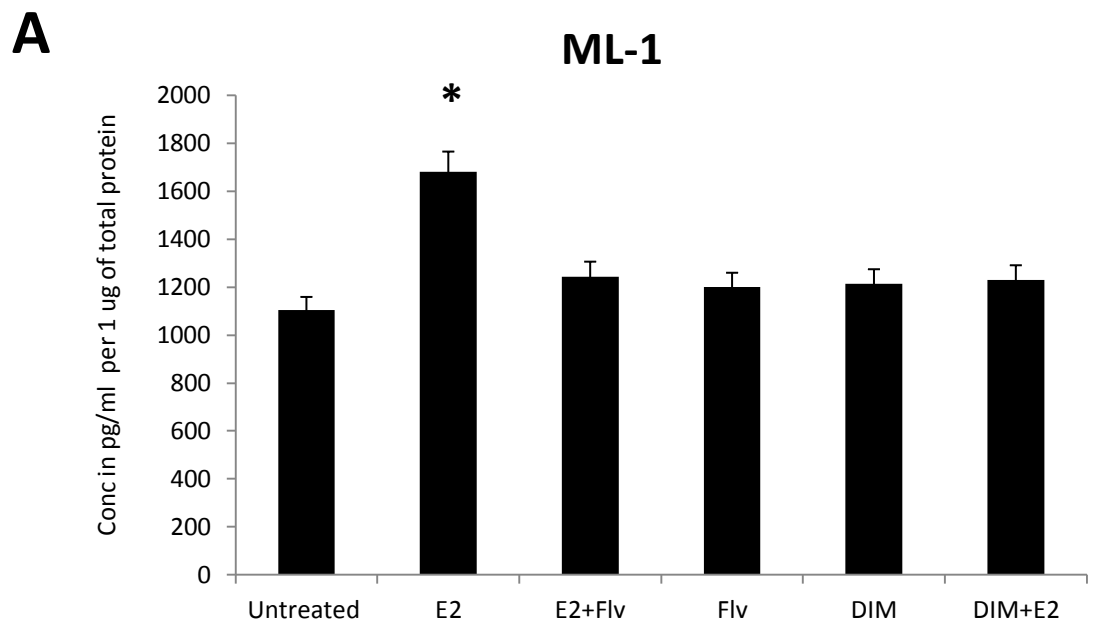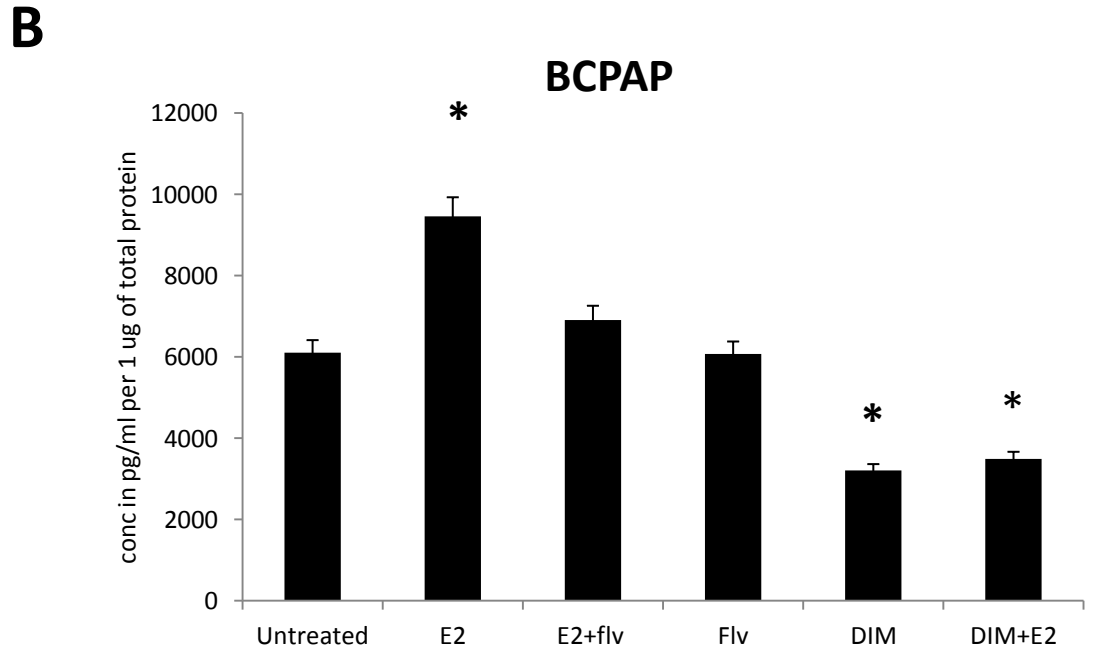

Supplement: 1479-5876-10-81-S2.pdf [file 1479-5876-10-81-S2.pdf]
